# Supplementary material for: Next-generation sequencing reveals the biological significance of the N2,3-ethenoguanine lesion in vivo
Source: PubMed Central journal article supplement — Nucleic Acids Res. 2015 Apr 2;43(11):5489–500. doi: 10.1093/nar/gkv243 (PMC4477646; doi:10.1093/nar/gkv243), 2015-04-02
Supplement: supp_gkv243_nar-00192-d-2015-File009.pdf [file supp_gkv243_nar-00192-d-2015-File009.pdf]

## Supplementary data

### Next-generation sequencing reveals the biological significance of the $N^2,3$ -ethenoguanine lesion *in vivo*

Shiou-chi Chang<sup>1,4</sup>, Bogdan I. Fedeles<sup>1,2,4</sup>, Jie Wu<sup>5</sup>, James C. Delaney<sup>1,2,4</sup>, Deyu Li<sup>1,2,4</sup>, Linlin Zhao<sup>7,9</sup>, Plamen P. Christov<sup>7,8,9</sup>, Emily Yau<sup>1,2,4</sup>, Vipender Singh<sup>1,2,4</sup>, Marco Jost<sup>2</sup>, Catherine L. Drennan<sup>2,3,6</sup>, Lawrence J. Marnett<sup>7,8,9,10</sup>, Carmelo J. Rizzo<sup>7,8,9,10</sup>, Stuart S. Levine<sup>5</sup>, F. Peter Guengerich<sup>7,9,10</sup> and John M. Essigmann<sup>1,2,4,\*</sup>

<sup>1</sup>Departments of Biological Engineering, <sup>2</sup>Chemistry, <sup>3</sup>Biology, <sup>4</sup>Center for Environmental Health Sciences, <sup>5</sup>BioMicro Center, and <sup>6</sup>Howard Hughes Medical Institute, Massachusetts Institute of Technology, Cambridge, Massachusetts 02139, United States

<sup>7</sup>Departments of Biochemistry, <sup>8</sup>Chemistry, and <sup>9</sup>Center in Molecular Toxicology, and <sup>10</sup>Vanderbilt-Ingram Cancer Center, Vanderbilt University, Nashville, Tennessee 37232, United States

\* To whom correspondence should be addressed. Tel: +1-617-253-6227; Fax: +1-617-253-5445; Email: [jessig@mit.edu](mailto:jessig@mit.edu)

Present Address:

[James C. Delaney], Visterra, Inc. Cambridge, MA 02139, United States

[Deyu Li], Department of Biomedical and Pharmaceutical Sciences, University of Rhode Island, Kingston, RI 02881, United States

[Linlin Zhao], Department of Chemistry and Biochemistry, Central Michigan University, Mount Pleasant, MI 48859, United States

[Plamen P. Christov], Chemical Synthesis Core, Vanderbilt Institute of Chemical Biology, Nashville, TN 37232, United States

## Table of Contents

**Table S1.** Error rate of the conserved sequence surrounding the site of interest in the control genome in wild type cells.

**Table S2.** Lesion bypass efficiency of 2'-F- $N^2,3$ - $\epsilon$ G, 1, $N^2$ - $\epsilon$ G, 2'-F-1, $N^2$ - $\epsilon$ G, 2'-FG and G in all five repair and replication backgrounds investigated.

**Table S3.** Number of reads obtained for each lesion from next-generation sequencing.

**Table S4.** Mutation frequency and specificity of all lesions and controls in all five repair and replication backgrounds investigated.

**Table S5.** Lesion bypass efficiency of 2'-F- $N^2,3$ - $\epsilon$ G and 1, $N^2$ - $\epsilon$ G as measured by the traditional CRAB assay.

**Table S6.** Mutation frequency and specificity of 2'-F- $N^2,3$ - $\epsilon$ G and 1, $N^2$ - $\epsilon$ G as measured by the traditional REAP assay.

**Figure S1.** Lesion bypass efficiency of 2'-F-1, $N^2$ - $\epsilon$ G in all five repair and replication backgrounds investigated.

**Figure S2.** Mutation frequency and specificity of 2'-F-1, $N^2$ - $\epsilon$ G in all five repair and replication backgrounds investigated.

**Figure S3.** Mass spectra demonstrating the activity of AlkB *in vitro* on  $\epsilon$ G-containing 16-mers.

**Figure S4.** Lesion bypass efficiency of 2'-F- $N^2,3$ - $\epsilon$ G and 1, $N^2$ - $\epsilon$ G as measured by the traditional CRAB assay.

**Figure S5.** Mutation frequency and specificity of 2'-F- $N^2,3$ - $\epsilon$ G and 1, $N^2$ - $\epsilon$ G as measured by the traditional REAP assay.

**Figure S6.** AlkB active site with a 3-methylcytosine lesion and with the iron(IV)-oxo intermediate modeled.

**Table S1.** Error rate of the conserved sequence surrounding the site of interest (site N in Figure 1 and this table) in the control genome in wild type cells. The expected sequence of the 21 bases encompassing the site of interest is 5'-ACGAAGACCTNGGCGTCCAAT-3' where N is the site of interest at position 6260. The average error rate from the three biological replicates at each of the 21 sites is presented along with the standard deviation.

| Position | Expected base | Average error rate | SD    |
|----------|---------------|--------------------|-------|
| 6250     | A             | 0.14%              | 0.04% |
| 6251     | C             | 0.26%              | 0.03% |
| 6252     | G             | 0.15%              | 0.05% |
| 6253     | A             | 0.16%              | 0.06% |
| 6254     | A             | 0.39%              | 0.02% |
| 6255     | G             | 0.26%              | 0.04% |
| 6256     | A             | 0.56%              | 0.10% |
| 6257     | C             | 0.64%              | 0.10% |
| 6258     | C             | 0.33%              | 0.04% |
| 6259     | T             | 0.48%              | 0.05% |
| 6260     | N             | 2.43%              | 0.25% |
| 6261     | G             | 0.60%              | 0.10% |
| 6262     | G             | 0.42%              | 0.05% |
| 6263     | C             | 0.29%              | 0.08% |
| 6264     | G             | 0.42%              | 0.01% |
| 6265     | T             | 0.38%              | 0.04% |
| 6266     | C             | 0.42%              | 0.14% |
| 6267     | C             | 0.45%              | 0.16% |
| 6268     | A             | 0.11%              | 0.01% |
| 6269     | A             | 0.09%              | 0.01% |
| 6270     | T             | 0.06%              | 0.03% |

**Table S2.** Lesion bypass efficiency of 2'-F- $N^2,3$ - $\epsilon$ G, 1, $N^2$ - $\epsilon$ G, 2'-F-1, $N^2$ - $\epsilon$ G, 2'-FG and G in all five repair and replication backgrounds investigated. Results are presented as average  $\pm$  one standard deviation (SD) of the three biological replicates.

| Repair/replication background                       | Lesions                      |                         |                              |                  |      |
|-----------------------------------------------------|------------------------------|-------------------------|------------------------------|------------------|------|
|                                                     | 2'-F- $N^2,3$ - $\epsilon$ G | 1, $N^2$ - $\epsilon$ G | 2'-F-1, $N^2$ - $\epsilon$ G | 2'-FG            | G    |
| HK81<br>(Wild type, $alkB^+$ / $dinB^+$ / $SOS^-$ ) | 21.0 $\pm$ 1.0%              | 4.4 $\pm$ 0.1%          | 4.6 $\pm$ 0.4%               | 98.0 $\pm$ 3.3%  | 100% |
| HK82<br>( $alkB^-$ / $dinB^+$ / $SOS^-$ )           | 25.7 $\pm$ 1.2%              | 1.8 $\pm$ 0.2%          | 4.4 $\pm$ 0.1%               | 107.0 $\pm$ 2.1% | 100% |
| HK82 $SOS^+$<br>( $alkB^-$ / $dinB^+$ / $SOS^+$ )   | 75.9 $\pm$ 0.5%              | 12.7 $\pm$ 0.2%         | 13.3 $\pm$ 0.5%              | 95.7 $\pm$ 0.9%  | 100% |
| HK84<br>( $alkB^-$ / $dinB^-$ / $SOS^-$ )           | 14.3 $\pm$ 2.6%              | 1.8 $\pm$ 0.1%          | 4.1 $\pm$ 0.1%               | 107.5 $\pm$ 3.0% | 100% |
| HK84 $SOS^+$<br>( $alkB^-$ / $dinB^-$ / $SOS^+$ )   | 28.9 $\pm$ 2.2%              | 4.7 $\pm$ 0.2%          | 6.6 $\pm$ 0.5%               | 100.5 $\pm$ 2.6% | 100% |

**Table S3.** Number of reads obtained for each lesion from next-generation sequencing. These data are the basis for determining the bypass efficiencies (see Materials and Methods). Mixing ratio is the ratio in which different lesion-containing genomes were mixed together before electroporation. Normalization ratio is the concentration correction factor obtained from the genome concentration normalization step in the assay (see Materials and Methods).

| Lesions               |           | 2'-F- $N^2$ ,3- $\epsilon$ G | 1, $N^2$ - $\epsilon$ G | 2'-F-1, $N^2$ - $\epsilon$ G | 2'-FG | G     |
|-----------------------|-----------|------------------------------|-------------------------|------------------------------|-------|-------|
| Mixing ratio          |           | 3                            | 3                       | 3                            | 1     | 1     |
| Normalization ratio   |           | 0.78                         | 1.02                    | 0.92                         | 0.99  | 1     |
| Cell                  | Replicate |                              |                         |                              |       |       |
| HK81                  | 1         | 9611                         | 2733                    | 2305                         | 19989 | 19949 |
|                       | 2         | 6694                         | 1715                    | 1803                         | 12545 | 12901 |
|                       | 3         | 3769                         | 1031                    | 1016                         | 7460  | 7965  |
| HK82                  | 1         | 3259                         | 274                     | 647                          | 5638  | 5205  |
|                       | 2         | 9196                         | 923                     | 1796                         | 16028 | 15242 |
|                       | 3         | 4692                         | 430                     | 1024                         | 8568  | 8204  |
| HK82 SOS <sup>+</sup> | 1         | 8384                         | 1795                    | 1775                         | 4389  | 4685  |
|                       | 2         | 21662                        | 4758                    | 4297                         | 11659 | 12267 |
|                       | 3         | 14999                        | 3332                    | 3112                         | 8060  | 8447  |
| HK84                  | 1         | 5690                         | 1024                    | 2202                         | 21618 | 19727 |
|                       | 2         | 4458                         | 789                     | 1580                         | 14654 | 14121 |
|                       | 3         | 6603                         | 952                     | 1944                         | 17345 | 16392 |
| HK84 SOS <sup>+</sup> | 1         | 11859                        | 2627                    | 3159                         | 19162 | 19209 |
|                       | 2         | 17103                        | 3651                    | 4739                         | 24981 | 24493 |
|                       | 3         | 21745                        | 4565                    | 5617                         | 29454 | 30407 |

**Table S4.** Mutation frequency and specificity of all lesions and controls in all five repair and replication backgrounds investigated. Data in each row are presented from the three biological replicates. %G, %A, %T and %C indicate the percentage of each base present at the lesion site (site N in Figure 1) of progeny DNA and %Δ denotes the frequency of deletion.

| 2'-F-N <sup>2</sup> ,3-εG |         |      |      |     |      |                    |     |     |      |      |
|---------------------------|---------|------|------|-----|------|--------------------|-----|-----|------|------|
|                           | Average |      |      |     |      | Standard deviation |     |     |      |      |
| Cells                     | %G      | %A   | %T   | %C  | %Δ   | %G                 | %A  | %T  | %C   | %Δ   |
| HK81                      | 67.4    | 30.2 | 0.4  | 1.2 | 0.7  | 2.0                | 1.8 | 0.1 | 0.1  | 0.1  |
| HK82                      | 68.7    | 29.7 | 0.6  | 0.1 | 0.7  | 1.2                | 1.1 | 0.3 | 0.1  | 0.4  |
| HK82 SOS <sup>+</sup>     | 59.1    | 38.1 | 2.1  | 0.2 | 0.3  | 1.3                | 1.4 | 0.2 | <0.1 | <0.1 |
| HK84                      | 66.1    | 31.2 | 1.2  | 0.2 | 1.1  | 3.9                | 3.3 | 0.5 | 0.1  | 0.1  |
| HK84 SOS <sup>+</sup>     | 56.6    | 38.6 | 4.0  | 0.2 | 0.4  | 0.7                | 0.7 | 0.3 | <0.1 | <0.1 |
| 1,N <sup>2</sup> -εG      |         |      |      |     |      |                    |     |     |      |      |
|                           | Average |      |      |     |      | Standard deviation |     |     |      |      |
| Cells                     | %G      | %A   | %T   | %C  | %Δ   | %G                 | %A  | %T  | %C   | %Δ   |
| HK81                      | 81.0    | 6.4  | 6.0  | 1.6 | 4.9  | 2.8                | 2.0 | 1.3 | 0.4  | 1.2  |
| HK82                      | 63.8    | 13.3 | 13.0 | 1.2 | 8.7  | 2.0                | 1.6 | 1.9 | 0.7  | 2.4  |
| HK82 SOS <sup>+</sup>     | 26.6    | 39.7 | 28.4 | 3.1 | 2.0  | 0.8                | 1.3 | 0.2 | 0.2  | 0.5  |
| HK84                      | 60.4    | 15.0 | 12.4 | 1.6 | 10.2 | 5.4                | 3.5 | 3.2 | 0.5  | 2.5  |
| HK84 SOS <sup>+</sup>     | 32.2    | 30.8 | 29.8 | 2.9 | 4.1  | 0.3                | 1.3 | 0.3 | 0.4  | 0.4  |
| 2'-F-1,N <sup>2</sup> -εG |         |      |      |     |      |                    |     |     |      |      |
|                           | Average |      |      |     |      | Standard deviation |     |     |      |      |
| Cells                     | %G      | %A   | %T   | %C  | %Δ   | %G                 | %A  | %T  | %C   | %Δ   |
| HK81                      | 41.4    | 6.3  | 2.5  | 2.0 | 47.7 | 1.6                | 1.2 | 0.2 | 0.3  | 1.0  |
| HK82                      | 42.5    | 6.5  | 2.8  | 0.9 | 47.2 | 2.7                | 2.0 | 0.2 | 0.1  | 1.4  |
| HK82 SOS <sup>+</sup>     | 17.9    | 30.0 | 32.3 | 3.4 | 16.3 | 1.0                | 1.7 | 0.8 | 0.2  | 0.7  |
| HK84                      | 41.4    | 6.5  | 3.8  | 1.8 | 46.3 | 2.5                | 1.0 | 0.8 | 0.9  | 1.1  |
| HK84 SOS <sup>+</sup>     | 28.8    | 18.4 | 20.7 | 3.4 | 28.7 | 2.1                | 1.6 | 2.4 | 0.4  | 2.2  |

(Continued onto the next page)

| 2'-FG                 |         |     |     |     |     |                    |     |      |      |      |
|-----------------------|---------|-----|-----|-----|-----|--------------------|-----|------|------|------|
|                       | Average |     |     |     |     | Standard deviation |     |      |      |      |
| Cells                 | %G      | %A  | %T  | %C  | %Δ  | %G                 | %A  | %T   | %C   | %Δ   |
| HK81                  | 97.4    | 0.8 | 0.2 | 1.0 | 0.5 | 0.4                | 0.4 | 0.1  | 0.3  | 0.1  |
| HK82                  | 98.0    | 1.1 | 0.2 | 0.1 | 0.5 | 0.8                | 0.7 | 0.1  | <0.1 | 0.1  |
| HK82 SOS <sup>+</sup> | 96.5    | 2.0 | 1.0 | 0.1 | 0.2 | 0.9                | 0.7 | 0.1  | 0.1  | <0.1 |
| HK84                  | 98.4    | 0.5 | 0.3 | 0.1 | 0.5 | 0.3                | 0.1 | <0.1 | <0.1 | 0.1  |
| HK84 SOS <sup>+</sup> | 97.7    | 1.0 | 0.6 | 0.1 | 0.4 | 0.2                | 0.1 | <0.1 | <0.1 | <0.1 |

  

| G                     |         |     |     |      |     |                    |     |      |      |      |
|-----------------------|---------|-----|-----|------|-----|--------------------|-----|------|------|------|
|                       | Average |     |     |      |     | Standard deviation |     |      |      |      |
| Cells                 | %G      | %A  | %T  | %C   | %Δ  | %G                 | %A  | %T   | %C   | %Δ   |
| HK81                  | 97.6    | 0.8 | 0.1 | 1.1  | 0.3 | 0.3                | 0.2 | <0.1 | 0.1  | <0.1 |
| HK82                  | 98.2    | 0.9 | 0.2 | 0.1  | 0.4 | 0.4                | 0.3 | <0.1 | 0.1  | 0.1  |
| HK82 SOS <sup>+</sup> | 97.0    | 1.7 | 0.7 | 0.1  | 0.2 | 0.5                | 0.4 | 0.1  | 0.1  | 0.1  |
| HK84                  | 98.6    | 0.5 | 0.2 | <0.1 | 0.3 | 0.2                | 0.1 | 0.1  | <0.1 | <0.1 |
| HK84 SOS <sup>+</sup> | 98.1    | 0.8 | 0.5 | 0.1  | 0.2 | 0.1                | 0.1 | <0.1 | <0.1 | <0.1 |

**Table S5.** Lesion bypass efficiency of 2'-F-N<sup>2</sup>,3-εG and 1,N<sup>2</sup>-εG as measured by the traditional Competitive Replication of Adduct Bypass (CRAB) assay (1). Only a subset of the strains shown in Table S2 was analyzed by this method. Results are presented as average ± one SD of the three biological replicates. A graphical representation of these data is shown in Figure S4.

| Repair/replication background | Lesions                   |                      |
|-------------------------------|---------------------------|----------------------|
|                               | 2'-F-N <sup>2</sup> ,3-εG | 1,N <sup>2</sup> -εG |
| HK81                          | 34.8 ± 6.1%               | 4.5 ± 0.6%           |
| HK82                          | 36.7 ± 11.8%              | 4.4 ± 1.4%           |
| HK82 SOS <sup>+</sup>         | 112 ± 4%                  | 9.8 ± 1.7%           |



**Table S6.** Mutation frequency and specificity of 2'-F-N<sup>2</sup>,3-εG and 1,N<sup>2</sup>-εG at the lesion site as measured by the traditional Restriction Endonuclease and Postlabeling (REAP) assay (1). Only a subset of the strains shown in Table S4 was analyzed by this method. Data in each row represent the three biological replicates. %G, %A, %T and %C indicate the percentage of each base present at lesion site of progeny DNA. A graphical representation of these data is shown in Figure S5.

| 2'-F-N <sup>2</sup> ,3-εG |         |      |      |     |                    |     |     |      |
|---------------------------|---------|------|------|-----|--------------------|-----|-----|------|
|                           | Average |      |      |     | Standard deviation |     |     |      |
| Cells                     | %G      | %A   | %T   | %C  | %G                 | %A  | %T  | %C   |
| HK81                      | 56.8    | 42.0 | 1.0  | 0.2 | 1.5                | 1.4 | 0.1 | <0.1 |
| HK82                      | 62.7    | 36.3 | 0.9  | 0.1 | 4.8                | 4.9 | 0.2 | 0.1  |
| HK82 SOS <sup>+</sup>     | 34.6    | 60.9 | 2.9  | 1.6 | 4.8                | 3.8 | 1.4 | 0.7  |
| 1,N <sup>2</sup> -εG      |         |      |      |     |                    |     |     |      |
|                           | Average |      |      |     | Standard deviation |     |     |      |
| Cells                     | %G      | %A   | %T   | %C  | %G                 | %A  | %T  | %C   |
| HK81                      | 80.0    | 7.5  | 7.4  | 5.1 | 2.8                | 1.5 | 0.8 | 1.4  |
| HK82                      | 50.5    | 26.5 | 16.5 | 6.6 | 10.4               | 5.1 | 5.6 | 0.5  |
| HK82 SOS <sup>+</sup>     | 15.4    | 47.2 | 33.4 | 4.0 | 2.3                | 1.0 | 1.7 | 1.8  |

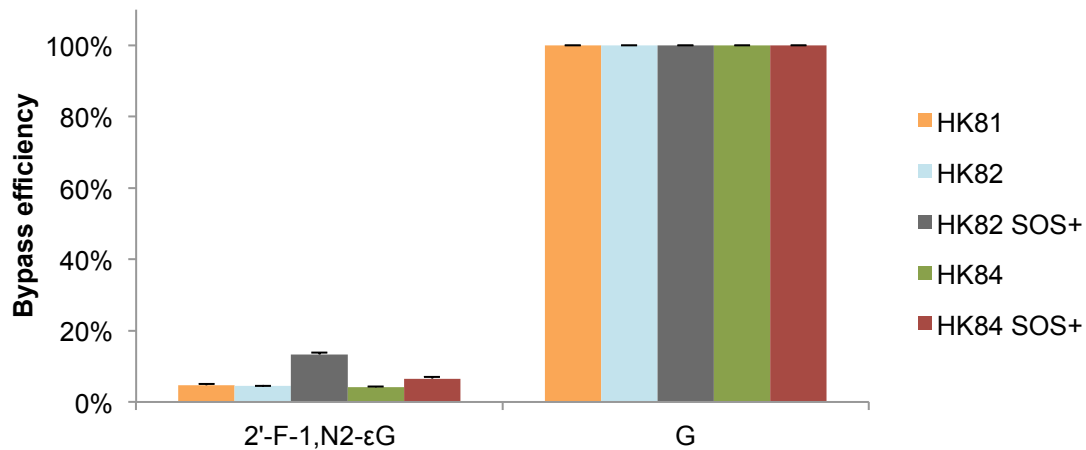

**Figure S1.** Lesion bypass efficiency of 2'-F-1,N<sup>2</sup>-εG relative to the control (G) in all five repair and replication backgrounds investigated. Error bars represent one SD (N = 3).

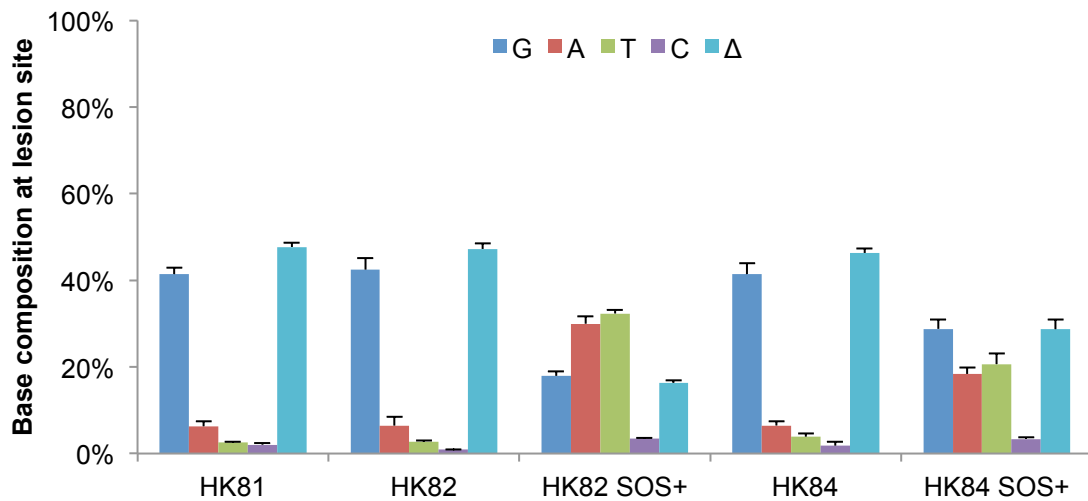

**Figure S2.** Mutation frequency and specificity of 2'-F-1,N<sup>2</sup>-εG in all five repair and replication backgrounds investigated. G, A, T and C indicate the possible bases present at the lesion site (site N of Figure 1) after *in vivo* replication, and Δ denotes the occurrence of deletions at the lesion site. The apparent high occurrence of deletions was determined to be due to the presence of a small sub-population of oligonucleotides with deletions in the starting material (i.e., oligonucleotides lacking the lesion site), which was disproportionately amplified due to the lacking of the highly toxic 2'-F-1,N<sup>2</sup>-εG lesion. Although the deletion mutation may be overly represented, nevertheless, the relative amounts of G, A, T and C bases at site N showing the point mutations induced by 2'-F-1,N<sup>2</sup>-εG are accurate. Error bars represent one SD (N = 3).

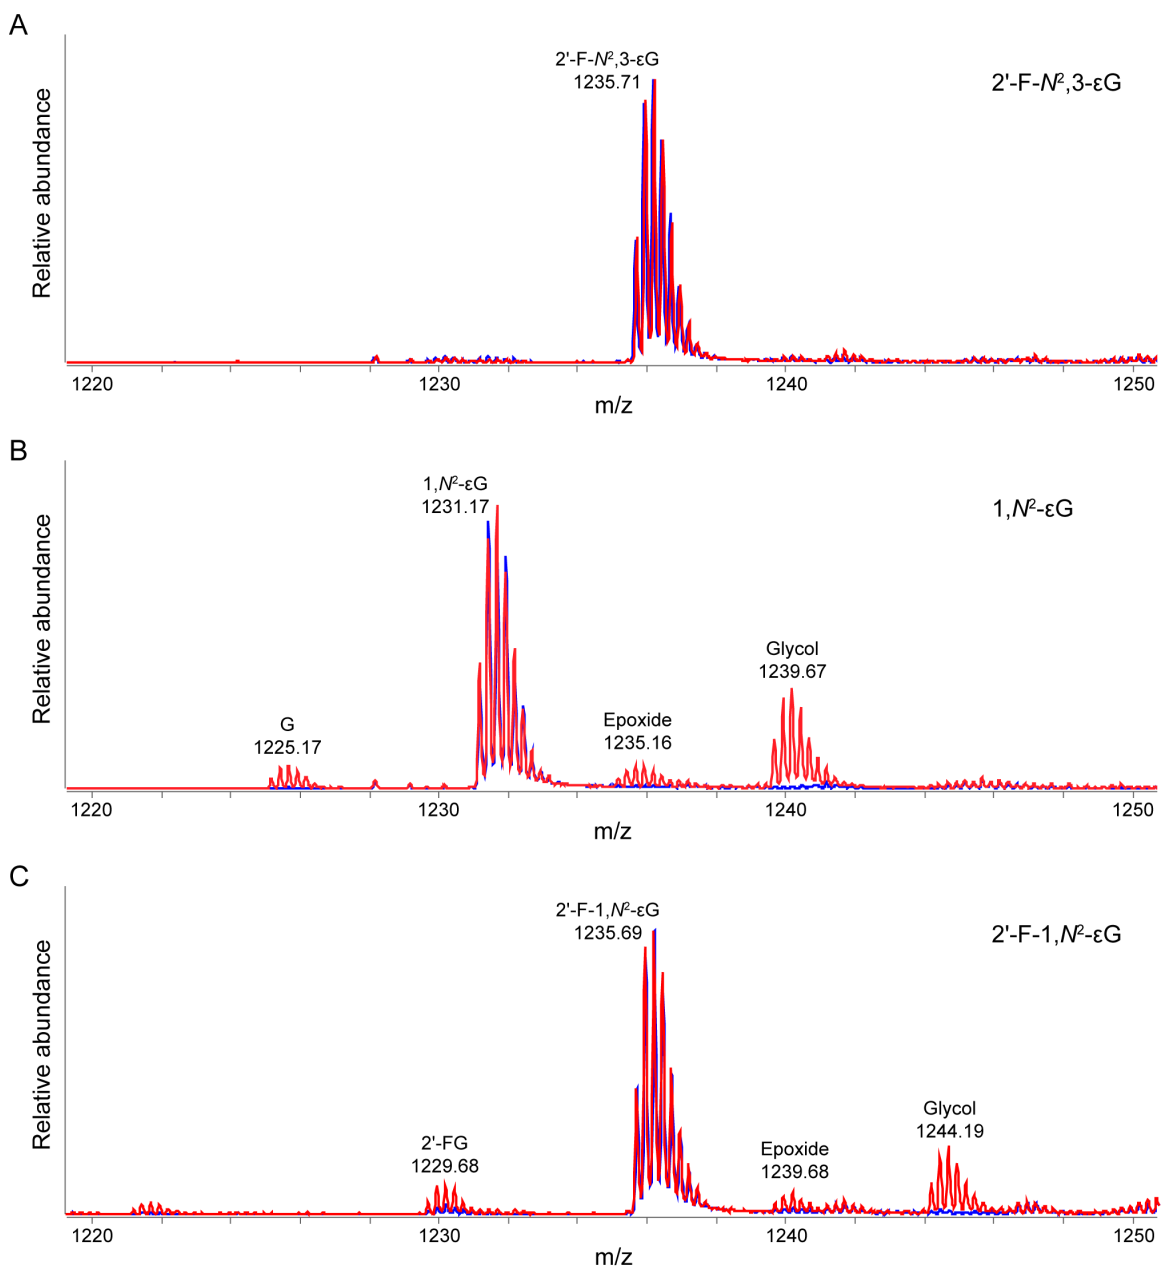

**Figure S3.** Mass spectra demonstrating the activity of AlkB *in vitro* on  $\epsilon$ G-containing 16-mers. Oligonucleotides were incubated in the presence (red) or absence (blue) of AlkB for one hour. Results shown here are the same as in Figure 6 with the addition of the negative controls (blue lines; no AlkB). Data represent the  $-4$  charge envelopes and the observed monoisotopic peak value is labeled above each peak envelope. Incubation with 16-mer containing a 2'-F- $N^2$ ,3- $\epsilon$ G (A), 1, $N^2$ - $\epsilon$ G (B) or 2'-F-1, $N^2$ - $\epsilon$ G (C).

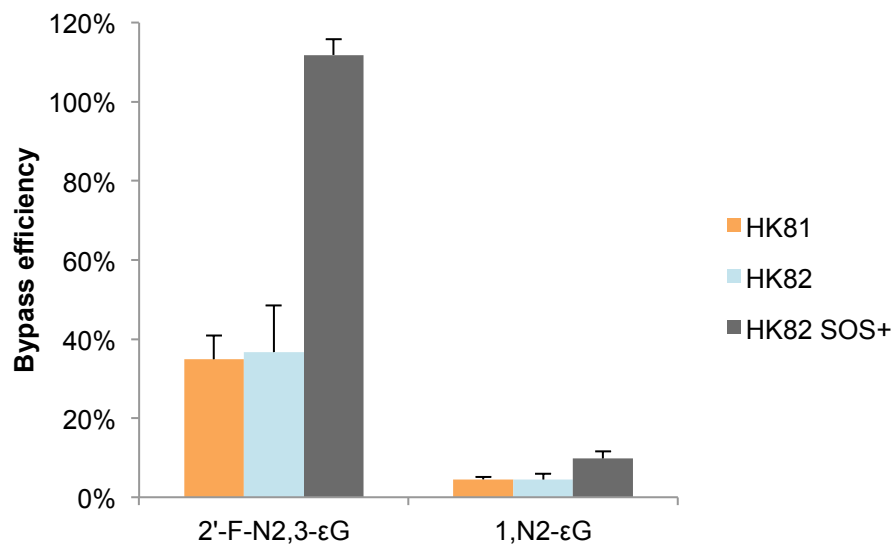

**Figure S4.** Lesion bypass efficiency of 2'-F-N<sup>2</sup>,3-εG and 1,N<sup>2</sup>-εG as measured by the traditional CRAB assay (1). Data are tabulated in Table S5. Error bars represent one SD (N = 3).

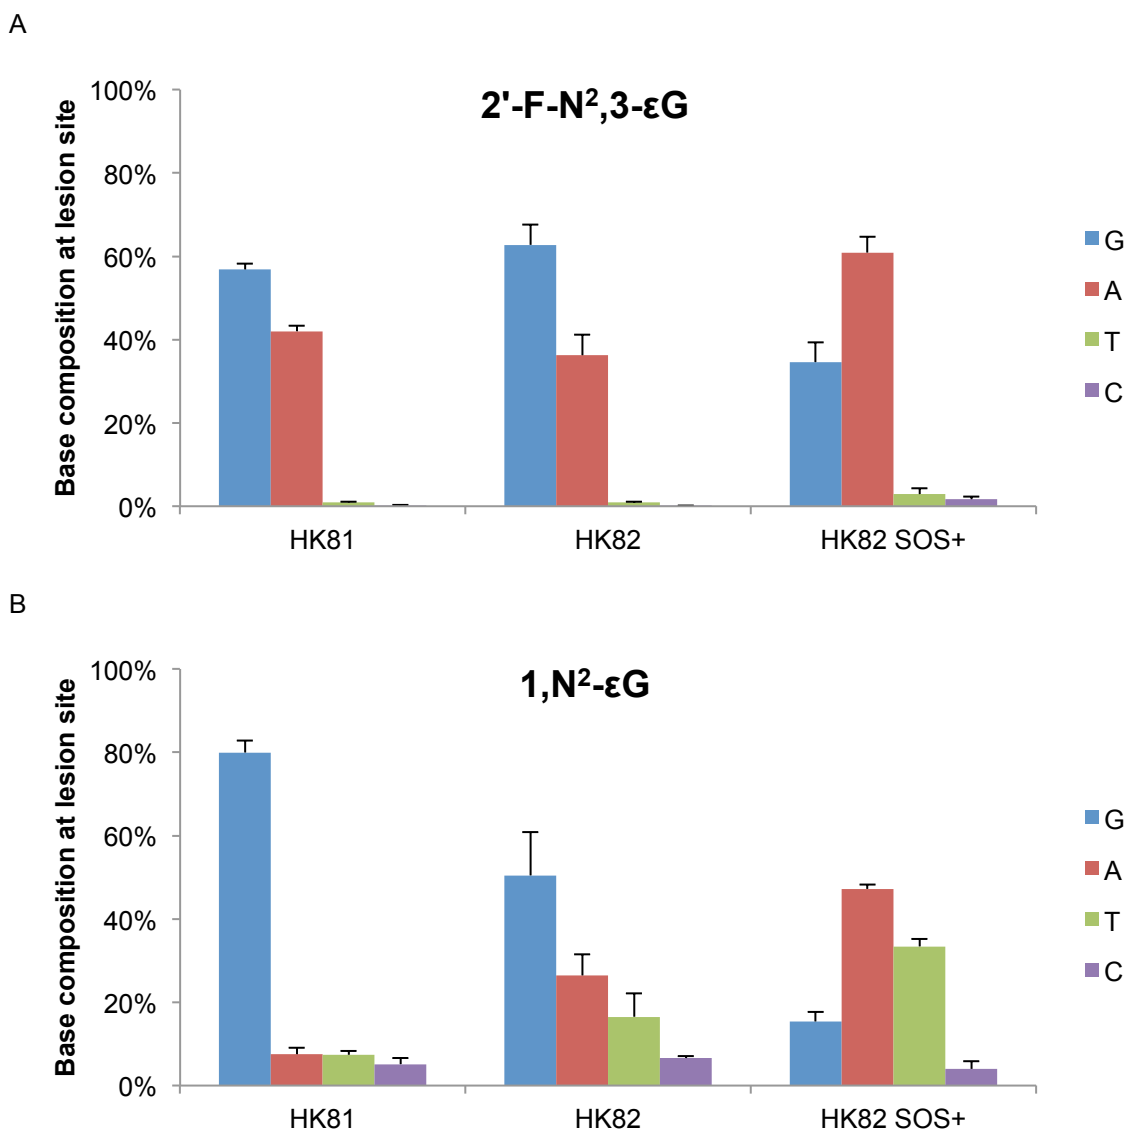

**Figure S5.** Mutation frequency and specificity of **(A)** 2'-F-N<sup>2</sup>,3-εG and **(B)** 1,N<sup>2</sup>-εG as measured by the traditional REAP assay (1). Data are tabulated in Table S6. G, A, T and C indicate the possible bases present at lesion sites in progeny DNA after *in vivo* replication. Error bars represent one SD (N = 3).

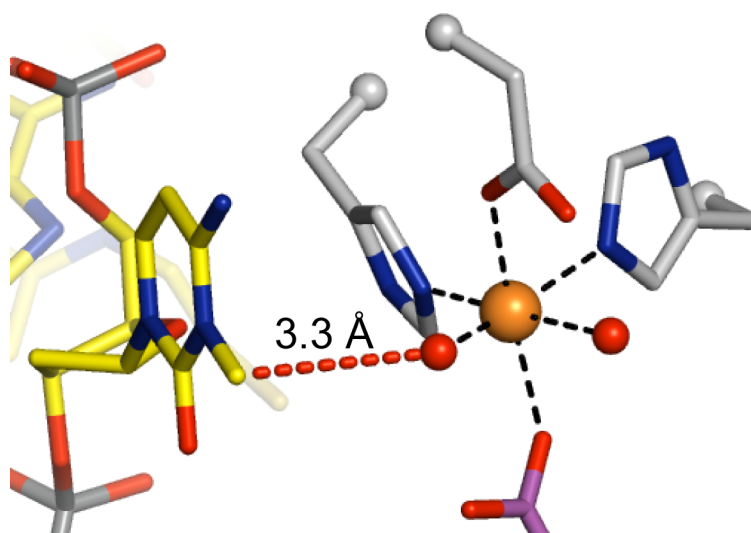

**Figure S6.** AlkB active site with a 3-methylcytosine lesion (yellow carbons, PDB ID 3O1M), a known good substrate for AlkB, and with the iron(IV)-oxo intermediate modeled. Selected AlkB amino acid residues are shown in grey, iron-bound succinate in purple, the iron ion as an orange sphere, and iron-bound oxygens (or water molecules) as red spheres. The iron(IV)-oxo intermediate is modeled based on a recent study, with an iron-oxygen distance of 1.62 Å. The red dashed line shows the distance from the iron(IV)-oxo center to the carbon of the methyl group on the base.

#### SUPPLEMENTARY REFERENCES

1. Delaney, J.C. and Essigmann, J.M. (2006) Assays for determining lesion bypass efficiency and mutagenicity of site-specific DNA lesions in vivo. *Methods Enzymol.*, **408**, 1-15.
